# Supplementary material for: The preparation and characterization of high-performance mesoporous carbon from a highly π-conjugated polybenzoxazine precursor
Source: Royal Society of Chemistry journal article supplement (doi:10.1039/d0nj06194h), 2021-01-01
Supplement: d0nj06194h1.pdf [file d0nj06194h1.pdf]

Supporting Information

Fig. S1 showing galvanostatic charge–discharge profiles of (A) the PC-SB and (B) the PC-BA at different current scanning rates at 0.2, 0.5, 1.0 and 2.0 A g<sup>-1</sup> is available free of charge via the Internet at <http://pubs.rsc.org>.
